# Supplementary material for: Prenatal PM2.5 Exposure Associated with Neonatal Gut Bacterial Colonization and Early Children’s Cognitive Development
Source: PubMed Central journal article supplement — Environ Health (Wash). 2024 Jul 2;2(11):802–15. doi: 10.1021/envhealth.4c00050 (PMC11574624; doi:10.1021/envhealth.4c00050), 2024-07-02
Supplement: eh4c00050_si_001.pdf [file eh4c00050_si_001.pdf]

## Supplementary materials

### **Prenatal PM<sub>2.5</sub> exposure associated with neonatal gut bacterial colonization and early children's cognitive development**

*Yang Liu*<sup>1,2†</sup>, *Liyi Zhang*<sup>1,2†</sup>, *Jieming Wang*<sup>1,2†</sup>, *Xinyao Sui*<sup>1,2</sup>, *Jiufeng Li*<sup>1,2</sup>, *Yuyan Gui*<sup>1,2</sup>,  
*Hang Wang*<sup>1,2</sup>, *Yue Zhao*<sup>1,2</sup>, *Yaqi Xu*<sup>1,2</sup>, *Weizhao Cao*<sup>1,2</sup>, *Pengpeng Wang*<sup>3\*</sup>, *Yunhui  
Zhang*<sup>1,2\*</sup>

<sup>1</sup> Key Lab of Health Technology Assessment, National Health Commission of the People's Republic of China (Fudan University), Shanghai 200032, China

<sup>2</sup> Key Laboratory of Public Health Safety, Ministry of Education, School of Public Health, Fudan University, Shanghai 200032, China

<sup>3</sup> Department of Environmental and Occupational Health, School of Public Health, Zhengzhou University, Henan, 450001, China.

† *These authors contribute to this work equally.*

\* *Corresponding authors: Yunhui Zhang ([yhzhang@shmu.edu.cn](mailto:yhzhang@shmu.edu.cn)); Pengpeng Wang ([wp7221@zzu.edu.cn](mailto:wp7221@zzu.edu.cn))*

## Content

|                                                                                                                                                    |    |
|----------------------------------------------------------------------------------------------------------------------------------------------------|----|
| Table S1. Demographic characteristics of the study subjects for 16sRNA sequencing.<br>.....                                                        | 3  |
| Table S2. Results of child neurodevelopmental assessments by Ages and Stages<br>Questionnaire (ASQ®-3) .....                                       | 5  |
| Table S3. Results of child suspected neurodevelopment delay (SDD) by Ages and<br>Stages Questionnaire (ASQ®-3) .....                               | 6  |
| Table S4. LEFSe analysis on GM between low and high PM <sub>2.5</sub> exposure groups during<br>pregnancy .....                                    | 9  |
| Table S5. Association of KEGG functional pathways with prenatal PM <sub>2.5</sub> exposure was<br>analyzed using MaAsLin2(FDR q-value < 0.25)..... | 15 |
| Table S6. Spearman's correlation analysis between KEGG functional pathways and<br>prenatal PM <sub>2.5</sub> exposure. ....                        | 17 |
| Figure S1. Prenatal individual PM <sub>2.5</sub> exposure of entire pregnancy and children's ASQ<br>scores .....                                   | 20 |
| Figure S2. The microbiota structures of neonatal feces samples from the prenatal PM <sub>2.5</sub><br>high exposure group and low group. ....      | 21 |
| Figure S3. The microbiota structures of neonatal feces samples from the SDD group<br>and control group. ....                                       | 21 |

**Table S1. Demographic characteristics of the study subjects for 16sRNA sequencing.**

| Variable                                                                         | Total subjects<br>(N = 361) | High exposure<br>(N = 180) | Low exposure<br>(N = 181) | P value* |
|----------------------------------------------------------------------------------|-----------------------------|----------------------------|---------------------------|----------|
| Prenatal personal PM <sub>2.5</sub> exposure during pregnancy, µg/m <sup>3</sup> |                             |                            |                           |          |
| Entire pregnancy                                                                 | 43.37 ± 3.66                | 46.3 ± 2.68                | 40.4 ± 1.51               | <0.001   |
| Prenatal personal temperature exposure during pregnancy, °C                      |                             |                            |                           |          |
| Entire pregnancy                                                                 | 18.0 ± 0.91                 | 17.7 ± 0.80                | 18.3 ± 0.92               | <0.001   |
| Prenatal personal humidity exposure during pregnancy, %rh                        |                             |                            |                           |          |
| Entire pregnancy                                                                 | 73.2 ± 2.37                 | 72.9 ± 1.72                | 73.6 ± 2.83               | 0.004    |
| Prenatal personal O <sub>3</sub> exposure during pregnancy, µg/m <sup>3</sup>    |                             |                            |                           |          |
| Entire pregnancy                                                                 | 93.7 ± 6.29                 | 96.3 ± 3.81                | 91.1 ± 7.16               | <0.001   |
| Prenatal personal CO exposure during pregnancy, µg/m <sup>3</sup>                |                             |                            |                           |          |
| Entire pregnancy                                                                 | 0.75 ± 0.05                 | 0.74 ± 0.04                | 0.76 ± 0.06               | <0.001   |
| Prenatal personal NO <sub>2</sub> exposure during pregnancy, µg/m <sup>3</sup>   |                             |                            |                           |          |
| Entire pregnancy                                                                 | 36.0 ± 6.55                 | 34.4 ± 4.33                | 37.7 ± 7.85               | <0.001   |
| Prenatal personal PM <sub>10</sub> exposure during pregnancy, µg/m <sup>3</sup>  |                             |                            |                           |          |
| Entire pregnancy                                                                 | 50.9 ± 6.49                 | 51.1 ± 4.97                | 50.7 ± 7.70               | 0.524    |
| Prenatal personal SO <sub>2</sub> exposure during pregnancy, µg/m <sup>3</sup>   |                             |                            |                           |          |
| Entire pregnancy                                                                 | 9.52 ± 1.68                 | 9.48 ± 1.20                | 9.55 ± 2.05               | 0.697    |
| Basic demographic characteristic                                                 |                             |                            |                           |          |
| Maternal Age, years                                                              | 29.2 ± 4.20                 | 28.8 ± 4.07                | 29.5 ± 4.31               | 0.152    |
| Maternal pregnancy BMI, kg/m <sup>2</sup>                                        | 21.6 ± 3.06                 | 21.3 ± 3.16                | 21.9 ± 2.94               | 0.055    |
| Gestation weight gain (GWG), kg                                                  | 13.5 ± 5.67                 | 13.2 ± 5.82                | 13.8 ± 5.51               | 0.330    |
| Maternal educational level                                                       |                             |                            |                           | 0.198    |
| Junior high school or below                                                      | 24 (6.65%)                  | 8 (4.44%)                  | 16 (8.84%)                |          |
| Senior high school or Junior college                                             | 190 (52.6%)                 | 94 (52.2%)                 | 96 (53.0%)                |          |
| College degree or above                                                          | 147 (40.7%)                 | 78 (43.3%)                 | 69 (38.1%)                |          |
| Annual family income, yuan                                                       |                             |                            |                           | 0.590    |
| <100,000                                                                         | 95 (26.3%)                  | 46 (25.6%)                 | 49 (27.1%)                |          |
| 100,000-300,000                                                                  | 239 (66.2%)                 | 118 (65.6%)                | 121 (66.9%)               |          |
| >300,000                                                                         | 27 (7.48%)                  | 16 (8.89%)                 | 11 (6.08%)                |          |
| Energy intake in pregnancy, kcal                                                 | 2236 ± 1080                 | 2263 ± 1151                | 2210 ± 1007               | 0.643    |
| Gestational age, weeks                                                           | 39.3 (1.26)                 | 39.4 (1.27)                | 39.3 (1.26)               | 0.308    |
| Child sex (%)                                                                    |                             |                            |                           | 0.372    |
| Male                                                                             | 196 (54.3%)                 | 93 (51.7%)                 | 103 (56.9%)               |          |
| Female                                                                           | 165 (45.7%)                 | 87 (48.3%)                 | 78 (43.1%)                |          |
| Mode of delivery (%)                                                             |                             |                            |                           | 0.999    |
| Vaginal                                                                          | 159 (44.0%)                 | 79 (43.9%)                 | 80 (44.2%)                |          |
| Caesarean                                                                        | 202 (56.0%)                 | 101 (56.1%)                | 101 (55.8%)               |          |
| Parity (%)                                                                       |                             |                            |                           | 0.796    |
| Primipara                                                                        | 202 (56.0%)                 | 99 (55.0%)                 | 103 (56.9%)               |          |
| Multipara                                                                        | 159 (44.0%)                 | 81 (45.0%)                 | 78 (43.1%)                |          |

Note: Mean  $\pm$  SD for continuous variables and  $N$  (%) for categorical variables; SD: Standard deviation; BMI, body mass index calculated as weight in kilograms divided by height in meters squared; preterm birth: gestational age  $< 37$  weeks.  $P$  value calculated using the Fisher's exact test and t-test.

**Table S2. Results of child neurodevelopmental assessments by Ages and Stages Questionnaire (ASQ®-3)**

| Neurodevelopmental assessments                             | Total subjects<br>( <i>N</i> = 361) | Boys<br>( <i>N</i> = 196) | Girls<br>( <i>N</i> = 165) | <i>P</i> value* |
|------------------------------------------------------------|-------------------------------------|---------------------------|----------------------------|-----------------|
| <b>Ages and Stages Questionnaire, 3rd edition (ASQ®-3)</b> |                                     |                           |                            |                 |
| <b>2 months of age</b>                                     |                                     |                           |                            |                 |
| ASQ-T <sup>a</sup>                                         | 236 ± 38.2                          | 233 ± 38.4                | 238 ± 37.8                 | 0.205           |
| Communication                                              | 44.0 ± 12.2                         | 43.2 ± 12.7               | 45.0 ± 11.6                | 0.178           |
| Gross motor                                                | 52.9 ± 8.95                         | 52.2 ± 9.24               | 53.6 ± 8.56                | 0.140           |
| Fine motor                                                 | 49.1 ± 8.68                         | 48.8 ± 8.73               | 49.5 ± 8.62                | 0.386           |
| Problem solving                                            | 44.1 ± 13.4                         | 44.4 ± 13.7               | 43.8 ± 13.0                | 0.658           |
| Personal-social                                            | 45.4 ± 10.0                         | 44.6 ± 9.92               | 46.4 ± 10.1                | 0.084           |
| <b>6 months of age</b>                                     |                                     |                           |                            |                 |
| ASQ-T <sup>a</sup>                                         | 221 ± 46.8                          | 218 ± 50.7                | 224 ± 41.7                 | 0.345           |
| Communication                                              | 48.7 ± 9.78                         | 48.5 ± 10.3               | 48.9 ± 9.14                | 0.754           |
| Gross motor                                                | 37.1 ± 12.0                         | 37.4 ± 12.5               | 36.8 ± 11.3                | 0.693           |
| Fine motor                                                 | 46.7 ± 12.5                         | 45.6 ± 13.0               | 47.9 ± 11.9                | 0.166           |
| Problem solving                                            | 47.2 ± 12.8                         | 47.1 ± 14.1               | 47.2 ± 11.1                | 0.953           |
| Personal-social                                            | 41.1 ± 14.3                         | 39.4 ± 14.9               | 43.0 ± 13.5                | 0.055           |
| <b>12 months of age</b>                                    |                                     |                           |                            |                 |
| ASQ-T <sup>a</sup>                                         | 241 ± 41.5                          | 237 ± 42.3                | 245 ± 40.2                 | 0.099           |
| Communication                                              | 50.8 ± 10.2                         | 49.8 ± 10.3               | 52.0 ± 9.87                | 0.078           |
| Gross motor                                                | 46.6 ± 13.3                         | 46.1 ± 12.8               | 47.2 ± 13.9                | 0.500           |
| Fine motor                                                 | 49.4 ± 10.5                         | 49.0 ± 10.8               | 50.0 ± 10.2                | 0.472           |
| Problem solving                                            | 48.6 ± 11.1                         | 48.3 ± 11.3               | 49.0 ± 10.9                | 0.624           |
| Personal-social                                            | 44.2 ± 13.2                         | 42.7 ± 13.4               | 46.2 ± 12.7                | <b>0.029*</b>   |
| <b>24 months of age</b>                                    |                                     |                           |                            |                 |
| ASQ-T <sup>a</sup>                                         | 247 ± 41.4                          | 246 ± 40.4                | 45.2 ± 12.2                | 0.731           |
| Communication                                              | 52.2 ± 11.1                         | 51.0 ± 12.1               | 45.2 ± 12.2                | 0.051           |
| Gross motor                                                | 52.4 ± 9.13                         | 52.5 ± 8.34               | 45.2 ± 12.2                | 0.945           |
| Fine motor                                                 | 49.7 ± 9.27                         | 50.1 ± 9.23               | 45.2 ± 12.2                | 0.457           |
| Problem solving                                            | 47.9 ± 11.1                         | 48.4 ± 10.9               | 45.2 ± 12.2                | 0.474           |
| Personal-social                                            | 44.6 ± 12.0                         | 44.1 ± 11.9               | 45.2 ± 12.2                | 0.466           |

Note: \*, *P* value calculated using the t-test; a, ASQ-T, total ASQ score.

**Table S3. Results of child suspected neurodevelopment delay (SDD) by Ages and Stages Questionnaire (ASQ®-3)**

| Neurodevelopmental assessments                             | Total subjects<br>( <i>N</i> = 361) | Boys<br>( <i>N</i> = 196) | Girls<br>( <i>N</i> = 165) | <i>P</i> value* |
|------------------------------------------------------------|-------------------------------------|---------------------------|----------------------------|-----------------|
| <b>Ages and Stages Questionnaire, 3rd edition (ASQ®-3)</b> |                                     |                           |                            |                 |
| <b>2 months of age</b>                                     |                                     |                           |                            |                 |
| SDD                                                        |                                     |                           |                            | 0.232           |
| Yes                                                        | 63 (17.5%)                          | 39 (19.9%)                | 24 (14.5%)                 |                 |
| No                                                         | 298 (82.5%)                         | 157 (80.1%)               | 141 (85.5%)                |                 |
| SDD-ASQ-T <sup>a</sup>                                     |                                     |                           |                            | 0.473           |
| Yes                                                        | 15 (4.16%)                          | 10 (5.10%)                | 5 (3.03%)                  |                 |
| No                                                         | 346 (95.8%)                         | 186 (94.9%)               | 160 (97.0%)                |                 |
| SDD-Communication                                          |                                     |                           |                            | 0.223           |
| Yes                                                        | 20 (5.54%)                          | 14 (7.14%)                | 6 (3.64%)                  |                 |
| No                                                         | 341 (94.5%)                         | 182 (92.9%)               | 159 (96.4%)                |                 |
| SDD-Gross motor                                            |                                     |                           |                            | 0.103           |
| Yes                                                        | 17 (4.71%)                          | 13 (6.63%)                | 4 (2.42%)                  |                 |
| No                                                         | 344 (95.3%)                         | 183 (93.4%)               | 161 (97.6%)                |                 |
| SDD-Fine motor                                             |                                     |                           |                            | 0.999           |
| Yes                                                        | 18 (4.99%)                          | 10 (5.10%)                | 8 (4.85%)                  |                 |
| No                                                         | 343 (95.0%)                         | 186 (94.9%)               | 157 (95.2%)                |                 |
| SDD-Problem solving                                        |                                     |                           |                            | 0.851           |
| Yes                                                        | 15 (4.16%)                          | 9 (4.59%)                 | 6 (3.64%)                  |                 |
| No                                                         | 346 (95.8%)                         | 187 (95.4%)               | 159 (96.4%)                |                 |
| <b>6 months of age</b>                                     |                                     |                           |                            |                 |
| SDD                                                        |                                     |                           |                            | 0.254           |
| Yes                                                        | 34 (15.2%)                          | 22 (18.2%)                | 12 (11.8%)                 |                 |
| No                                                         | 189 (84.8%)                         | 99 (81.8%)                | 90 (88.2%)                 |                 |
| SDD-ASQ-T <sup>a</sup>                                     |                                     |                           |                            | 0.351           |
| Yes                                                        | 10 (4.48%)                          | 7 (5.79%)                 | 3 (2.94%)                  |                 |
| No                                                         | 213 (95.5%)                         | 114 (94.2%)               | 99 (97.1%)                 |                 |
| SDD-Communication                                          |                                     |                           |                            | 0.889           |

|                         |             |             |             |       |
|-------------------------|-------------|-------------|-------------|-------|
| Yes                     | 17 (7.62%)  | 10 (8.26%)  | 7 (6.86%)   |       |
| No                      | 206 (92.4%) | 111 (91.7%) | 95 (93.1%)  |       |
| SDD-Gross motor         |             |             |             | 0.458 |
| Yes                     | 7 (3.14%)   | 5 (4.13%)   | 2 (1.96%)   |       |
| No                      | 216 (96.9%) | 116 (95.9%) | 100 (98.0%) |       |
| SDD-Fine motor          |             |             |             | 0.236 |
| Yes                     | 12 (5.38%)  | 9 (7.44%)   | 3 (2.94%)   |       |
| No                      | 211 (94.6%) | 112 (92.6%) | 99 (97.1%)  |       |
| SDD-Problem solving     |             |             |             | 0.161 |
| Yes                     | 13 (5.83%)  | 10 (8.26%)  | 3 (2.94%)   |       |
| No                      | 210 (94.2%) | 111 (91.7%) | 99 (97.1%)  |       |
| <b>12 months of age</b> |             |             |             |       |
| SDD                     |             |             |             | 0.474 |
| Yes                     | 43 (15.9%)  | 27 (17.6%)  | 16 (13.7%)  |       |
| No                      | 227 (84.1%) | 126 (82.4%) | 101 (86.3%) |       |
| SDD-ASQ-Ta              |             |             |             | 0.192 |
| Yes                     | 10 (3.94%)  | 8 (5.67%)   | 2 (1.77%)   |       |
| No                      | 244 (96.1%) | 133 (94.3%) | 111 (98.2%) |       |
| SDD-Communication       |             |             |             | 0.314 |
| Yes                     | 20 (7.52%)  | 14 (9.27%)  | 6 (5.22%)   |       |
| No                      | 246 (92.5%) | 137 (90.7%) | 109 (94.8%) |       |
| SDD-Gross motor         |             |             |             | 0.999 |
| Yes                     | 10 (3.77%)  | 6 (4.03%)   | 4 (3.45%)   |       |
| No                      | 255 (96.2%) | 143 (96.0%) | 112 (96.6%) |       |
| SDD-Fine motor          |             |             |             | 0.999 |
| Yes                     | 8 (3.02%)   | 5 (3.36%)   | 3 (2.59%)   |       |
| No                      | 257 (97.0%) | 144 (96.6%) | 113 (97.4%) |       |
| SDD-Problem solving     |             |             |             | 0.891 |
| Yes                     | 13 (4.91%)  | 8 (5.41%)   | 5 (4.27%)   |       |
| No                      | 252 (95.1%) | 140 (94.6%) | 112 (95.7%) |       |
| <b>24 months of age</b> |             |             |             |       |
| SDD                     |             |             |             | 0.302 |
| Yes                     | 30 (13.0%)  | 20 (15.4%)  | 10 (9.90%)  |       |
| No                      | 201 (87.0%) | 110 (84.6%) | 91 (90.1%)  |       |
| SDD-ASQ-Ta              |             |             |             | 0.999 |
| Yes                     | 12 (5.19%)  | 7 (5.38%)   | 5 (4.95%)   |       |
| No                      | 219 (94.8%) | 123 (94.6%) | 96 (95.0%)  |       |
| SDD-Communication       |             |             |             | 0.760 |
| Yes                     | 11 (4.76%)  | 7 (5.38%)   | 4 (3.96%)   |       |
| No                      | 220 (95.2%) | 123 (94.6%) | 97 (96.0%)  |       |
| SDD-Gross motor         |             |             |             | 0.218 |
| Yes                     | 11 (4.76%)  | 4 (3.08%)   | 7 (6.93%)   |       |

|                     |             |             |            |       |
|---------------------|-------------|-------------|------------|-------|
| No                  | 220 (95.2%) | 126 (96.9%) | 94 (93.1%) |       |
| SDD-Fine motor      |             |             |            | 0.760 |
| Yes                 | 11 (4.76%)  | 7 (5.38%)   | 4 (3.96%)  |       |
| No                  | 220 (95.2%) | 123 (94.6%) | 97 (96.0%) |       |
| SDD-Problem solving |             |             |            | 0.519 |
| Yes                 | 10 (4.33%)  | 7 (5.38%)   | 3 (2.97%)  |       |
| No                  | 221 (95.7%) | 123 (94.6%) | 98 (97.0%) |       |

---

Note: \*, *P* value calculated using the t-test; a, ASQ-T, total ASQ score.



**Table S4. LEFSe analysis on GM between low and high PM<sub>2.5</sub> exposure groups during pregnancy**

| genus                                                                                                           | group | LDA   | <i>P</i> value |
|-----------------------------------------------------------------------------------------------------------------|-------|-------|----------------|
| k__Bacteria p__Proteobacteria c__Gammaproteobacteria o__Enterobacteriales f__Enterobacteriaceae g__Cronobacter  | high  | 2.866 | 0.013          |
| k__Bacteria p__Proteobacteria c__Gammaproteobacteria o__NA f__NA                                                | high  | 2.649 | 0.044          |
| k__Bacteria p__Proteobacteria c__Gammaproteobacteria o__Pseudomonadales f__Pseudomonadaceae                     | high  | 3.844 | 0.022          |
| k__Bacteria p__Firmicutes c__Clostridia o__Clostridiales f__Peptostreptococcaceae g__Paraclostridium            | high  | 2.606 | 0.044          |
| k__Bacteria p__Fusobacteria c__Fusobacteriia o__Fusobacteriales f__Leptotrichiaceae                             | high  | 2.661 | 0.014          |
| k__Bacteria p__Proteobacteria c__Gammaproteobacteria o__Enterobacteriales f__Enterobacteriaceae g__Rahnella     | high  | 2.753 | 0.001          |
| k__Bacteria p__Fusobacteria c__Fusobacteriia                                                                    | high  | 2.700 | 0.044          |
| k__Bacteria p__Proteobacteria c__Gammaproteobacteria o__Enterobacteriales f__Enterobacteriaceae g__Enterobacter | high  | 3.916 | 0.031          |
| k__Bacteria p__Bacteroidetes c__Bacteroidia o__Bacteroidales f__Paludibacteraceae g__F0058                      | high  | 2.252 | 0.020          |
| k__Bacteria p__Proteobacteria c__Gammaproteobacteria o__Enterobacteriales                                       | high  | 4.673 | 0.040          |
| k__Bacteria p__Proteobacteria c__Gammaproteobacteria o__NA                                                      | high  | 2.540 | 0.044          |
| k__Bacteria p__Proteobacteria c__Gammaproteobacteria o__Enterobacteriales f__Enterobacteriaceae g__Serratia     | high  | 3.460 | 0.029          |
| k__Bacteria p__Proteobacteria c__Gammaproteobacteria o__Pseudomonadales f__Pseudomonadaceae g__Pseudomonas      | high  | 3.844 | 0.022          |
| k__Bacteria p__Proteobacteria c__Gammaproteobacteria o__Enterobacteriales f__Enterobacteriaceae                 | high  | 4.673 | 0.040          |
| k__Bacteria p__Fusobacteria c__Fusobacteriia o__Fusobacteriales                                                 | high  | 2.728 | 0.044          |
| k__Bacteria p__Actinobacteria c__Actinobacteria o__Corynebacteriales f__Corynebacteriaceae g__Corynebacterium   | high  | 2.468 | 0.018          |

|                                                                                                                                                     |      |       |       |
|-----------------------------------------------------------------------------------------------------------------------------------------------------|------|-------|-------|
| k__Bacteria p__Fusobacteria                                                                                                                         | high | 2.688 | 0.044 |
| k__Bacteria p__Fusobacteria c__Fusobacteriia o__Fusobacteriales f__Leptotrichiaceae g__Leptotrichia                                                 | high | 2.659 | 0.006 |
| k__Bacteria p__Proteobacteria c__Gammaproteobacteria o__NA f__NA g__NA                                                                              | high | 2.676 | 0.044 |
| k__Bacteria p__Bacteroidetes c__Bacteroidia o__Bacteroidales f__Paludibacteraceae                                                                   | high | 2.216 | 0.020 |
| k__Bacteria p__Bacteroidetes c__Bacteroidia o__Bacteroidales f__Prevotellaceae g__Prevotellaceae_Ga6A1_group                                        | low  | 2.173 | 0.009 |
| k__Bacteria p__Actinobacteria c__Rubrobacteria o__Rubrobacterales f__Rubrobacteriaceae                                                              | low  | 2.174 | 0.019 |
| k__Bacteria p__Proteobacteria c__Gammaproteobacteria o__Betaproteobacteriales f__Burkholderiaceae g__Burkholderia_Caballero<br>nia_Paraburkholderia | low  | 2.184 | 0.007 |
| k__Bacteria p__Patescibacteria                                                                                                                      | low  | 2.657 | 0.041 |
| k__Bacteria p__Bacteroidetes c__Bacteroidia o__Bacteroidales f__Tannerellaceae g__Parabacteroides                                                   | low  | 2.248 | 0.020 |
| k__Bacteria p__Firmicutes c__Erysipelotrichia o__Erysipelotrichales f__Erysipelotrichaceae                                                          | low  | 3.034 | 0.000 |
| k__Bacteria p__Firmicutes c__Clostridia o__Clostridiales f__Ruminococcaceae g__Ruminococcus_2                                                       | low  | 2.138 | 0.006 |
| k__Bacteria p__Firmicutes c__Clostridia o__Clostridiales f__Lachnospiraceae                                                                         | low  | 3.654 | 0.000 |
| k__Bacteria p__Proteobacteria c__Gammaproteobacteria o__Enterobacteriales f__Enterobacteriaceae g__Citrobacter                                      | low  | 2.812 | 0.045 |
| k__Bacteria p__Proteobacteria c__Gammaproteobacteria o__Betaproteobacteriales                                                                       | low  | 3.564 | 0.000 |
| k__Bacteria p__Firmicutes c__Bacilli o__Lactobacillales f__Lactobacillaceae g__Lactobacillus                                                        | low  | 3.847 | 0.001 |
| k__Bacteria p__Firmicutes c__Erysipelotrichia o__Erysipelotrichales                                                                                 | low  | 3.042 | 0.000 |
| k__Bacteria p__Actinobacteria c__Rubrobacteria                                                                                                      | low  | 2.323 | 0.019 |
| k__Bacteria p__Bacteroidetes c__Bacteroidia o__Bacteroidales f__Rikenellaceae g__Alistipes                                                          | low  | 2.952 | 0.010 |

|                                                                                                                          |     |       |       |
|--------------------------------------------------------------------------------------------------------------------------|-----|-------|-------|
| k__Bacteria p__Firmicutes c__Clostridia o__Clostridiales f__Peptostreptococcaceae                                        | low | 2.629 | 0.012 |
| k__Bacteria p__Firmicutes c__Bacilli o__Bacillales f__Sporolactobacillaceae                                              | low | 2.013 | 0.006 |
| k__Bacteria p__Bacteroidetes c__Bacteroidia o__Bacteroidales                                                             | low | 3.508 | 0.041 |
| k__Bacteria p__Firmicutes c__Clostridia o__Clostridiales f__Ruminococcaceae                                              | low | 3.265 | 0.004 |
| k__Bacteria p__Actinobacteria c__Coriobacteriia o__Coriobacteriales f__Eggerthellaceae                                   | low | 2.146 | 0.001 |
| k__Bacteria p__Firmicutes c__Negativicutes o__Selenomonadales                                                            | low | 2.293 | 0.037 |
| k__Bacteria p__Firmicutes c__Clostridia o__Clostridiales f__Ruminococcaceae g__Eubacterium_coprostanoligenes_group       | low | 2.007 | 0.002 |
| k__Bacteria p__Actinobacteria c__Rubrobacteria o__Rubrobacterales                                                        | low | 2.486 | 0.019 |
| k__Bacteria p__Firmicutes c__Clostridia o__Clostridiales f__Lachnospiraceae g__Eubacterium_hallii_group                  | low | 2.263 | 0.025 |
| k__Bacteria p__Patescibacteria c__Saccharimonadia o__Saccharimonadales f__Saccharimonadaceae g__Candidatus_Saccharimonas | low | 2.662 | 0.016 |
| k__Bacteria p__Firmicutes c__Clostridia o__Clostridiales f__Lachnospiraceae g__NA                                        | low | 2.512 | 0.004 |
| k__Bacteria p__Proteobacteria c__Gammaproteobacteria o__Pasteurellales f__Pasteurellaceae g__Haemophilus                 | low | 2.363 | 0.002 |
| k__Bacteria p__Firmicutes c__Bacilli o__Bacillales f__Sporolactobacillaceae g__uncultured                                | low | 2.006 | 0.006 |
| k__Bacteria p__Actinobacteria c__Actinobacteria o__Corynebacteriales f__Nocardiaceae                                     | low | 3.064 | 0.002 |
| k__Bacteria p__Verrucomicrobia c__Verrucomicrobiae                                                                       | low | 2.568 | 0.015 |
| k__Bacteria p__Firmicutes c__Erysipelotrichia o__Erysipelotrichales f__Erysipelotrichaceae g__Dubosiella                 | low | 2.493 | 0.000 |
| k__Bacteria p__Firmicutes c__Clostridia o__Clostridiales f__Eubacteriaceae                                               | low | 2.183 | 0.019 |
| k__Bacteria p__Proteobacteria c__Gammaproteobacteria o__Betaproteobacteriales f__Burkholderiaceae                        | low | 3.565 | 0.000 |
| k__Bacteria p__Firmicutes c__Clostridia                                                                                  | low | 3.938 | 0.000 |

|                                                                                                                                              |     |       |       |
|----------------------------------------------------------------------------------------------------------------------------------------------|-----|-------|-------|
| k__Bacteria p__Acidobacteria c__Acidobacteriia o__Subgroup_2 f__uncultured_Acidobacteria_bacterium g__uncultured_Acidobact<br>eria_bacterium | low | 2.356 | 0.004 |
| k__Bacteria p__Proteobacteria c__Deltaproteobacteria o__Desulfovibrionales                                                                   | low | 2.453 | 0.010 |
| k__Bacteria p__Acidobacteria c__Acidobacteriia o__Subgroup_2 f__uncultured_Acidobacteria_bacterium                                           | low | 2.429 | 0.004 |
| k__Bacteria p__Proteobacteria c__Alphaproteobacteria o__Rhizobiales f__Rhizobiaceae g__Mesorhizobium                                         | low | 3.136 | 0.004 |
| k__Bacteria p__Proteobacteria c__Gammaproteobacteria o__Betaproteobacteriales f__Burkholderiaceae g__Noviherbaspirillum                      | low | 2.658 | 0.032 |
| k__Bacteria p__Bacteroidetes c__Bacteroidia o__Bacteroidales f__Rikenellaceae                                                                | low | 2.985 | 0.013 |
| k__Bacteria p__Actinobacteria c__Coriobacteriia o__Coriobacteriales                                                                          | low | 3.037 | 0.000 |
| k__Bacteria p__Bacteroidetes c__Bacteroidia o__Bacteroidales f__Bacteroidaceae g__Bacteroides                                                | low | 3.064 | 0.017 |
| k__Bacteria p__Proteobacteria c__Gammaproteobacteria o__Betaproteobacteriales f__Burkholderiaceae g__Parasutterella                          | low | 2.194 | 0.010 |
| k__Bacteria p__Proteobacteria c__Alphaproteobacteria o__Azospirillales                                                                       | low | 2.597 | 0.025 |
| k__Bacteria p__Actinobacteria c__Coriobacteriia                                                                                              | low | 3.028 | 0.000 |
| k__Bacteria p__Bacteroidetes c__Bacteroidia                                                                                                  | low | 3.499 | 0.032 |
| k__Bacteria p__Firmicutes c__Negativicutes                                                                                                   | low | 2.289 | 0.037 |
| k__Bacteria p__Firmicutes c__Clostridia o__Clostridiales f__Clostridiaceae_1 g__Clostridium_sensu_stricto_1                                  | low | 3.393 | 0.008 |
| k__Bacteria p__Acidobacteria c__Acidobacteriia o__Subgroup_2                                                                                 | low | 2.027 | 0.019 |
| k__Bacteria p__Bacteroidetes c__Bacteroidia o__Bacteroidales f__Bacteroidaceae                                                               | low | 3.040 | 0.017 |
| k__Bacteria p__Patescibacteria c__Saccharimonadia                                                                                            | low | 2.657 | 0.024 |
| k__Bacteria p__Firmicutes c__Erysipelotrichia o__Erysipelotrichales f__Erysipelotrichaceae g__Erysipelatoclostridium                         | low | 2.373 | 0.000 |
| k__Bacteria p__Actinobacteria c__Coriobacteriia o__Coriobacteriales f__Coriobacteriaceae g__Collinsella                                      | low | 2.973 | 0.000 |

|                                                                                                                      |     |       |       |
|----------------------------------------------------------------------------------------------------------------------|-----|-------|-------|
| k__Bacteria p__Verrucomicrobia                                                                                       | low | 2.550 | 0.015 |
| k__Bacteria p__Verrucomicrobia c__Verrucomicrobiae o__Verrucomicrobiales f__Akkermansiaceae g__Akkermansia           | low | 2.573 | 0.008 |
| k__Bacteria p__Actinobacteria c__Actinobacteria o__Corynebacteriales f__Nocardiaceae g__Rhodococcus                  | low | 3.067 | 0.004 |
| k__Bacteria p__Firmicutes c__Clostridia o__Clostridiales                                                             | low | 3.938 | 0.000 |
| k__Bacteria p__Firmicutes c__Bacilli o__Lactobacillales f__Lactobacillaceae                                          | low | 3.847 | 0.001 |
| k__Bacteria p__Firmicutes c__Clostridia o__Clostridiales f__Clostridiaceae_1                                         | low | 3.375 | 0.010 |
| k__Bacteria p__Actinobacteria c__Coriobacteriia o__Coriobacteriales f__Coriobacteriaceae                             | low | 2.973 | 0.000 |
| k__Bacteria p__Verrucomicrobia c__Verrucomicrobiae o__Verrucomicrobiales f__Akkermansiaceae                          | low | 2.575 | 0.008 |
| k__Bacteria p__Actinobacteria c__Rubrobacteria o__Rubrobacterales f__Rubrobacteriaceae g__Rubrobacter                | low | 2.280 | 0.019 |
| k__Bacteria p__Firmicutes c__Clostridia o__Clostridiales f__Lachnospiraceae g__Fusicatenibacter                      | low | 2.385 | 0.002 |
| k__Bacteria p__Firmicutes c__Clostridia o__Clostridiales f__Eubacteriaceae g__Eubacterium                            | low | 2.170 | 0.019 |
| k__Bacteria p__Proteobacteria c__Deltaproteobacteria                                                                 | low | 2.414 | 0.007 |
| k__Bacteria p__Bacteroidetes                                                                                         | low | 3.499 | 0.032 |
| k__Bacteria p__Bacteroidetes c__Bacteroidia o__Bacteroidales f__Tannerellaceae                                       | low | 2.225 | 0.036 |
| k__Bacteria p__Patescibacteria c__Saccharimonadia o__Saccharimonadales                                               | low | 2.648 | 0.024 |
| k__Bacteria p__Firmicutes c__Clostridia o__Clostridiales f__Lachnospiraceae g__Anaerostipes                          | low | 2.127 | 0.000 |
| k__Bacteria p__Proteobacteria c__Alphaproteobacteria o__Rhizobiales f__Rhizobiaceae                                  | low | 3.157 | 0.001 |
| k__Bacteria p__Bacteroidetes c__Bacteroidia o__Bacteroidales f__Muribaculaceae g__uncultured_bacterium               | low | 2.907 | 0.045 |
| k__Bacteria p__Epsilonbacteraeota c__Campylobacteria o__Campylobacterales f__Sulfurospirillaceae g__Sulfurospirillum | low | 2.486 | 0.045 |

|                                                                                                                |     |       |       |
|----------------------------------------------------------------------------------------------------------------|-----|-------|-------|
| k__Bacteria p__Epsilonbacteraeota c__Campylobacteria o__Campylobacterales f__Sulfurospirillaceae               | low | 2.596 | 0.045 |
| k__Bacteria p__Proteobacteria c__Gammaproteobacteria o__Betaproteobacteriales f__Burkholderiaceae g__Ralstonia | low | 3.496 | 0.000 |
| k__Bacteria p__Firmicutes c__Erysipelotrichia                                                                  | low | 3.039 | 0.000 |
| k__Bacteria p__Verrucomicrobia c__Verrucomicrobiae o__Verrucomicrobiales                                       | low | 2.566 | 0.012 |
| k__Bacteria p__Proteobacteria c__Alphaproteobacteria                                                           | low | 3.177 | 0.044 |
| k__Bacteria p__Firmicutes c__Clostridia o__Clostridiales f__Lachnospiraceae g__Blautia                         | low | 3.226 | 0.000 |
| k__Bacteria p__Firmicutes c__Clostridia o__Clostridiales f__Lachnospiraceae g__Ruminococcus gnavus group       | low | 3.121 | 0.000 |
| k__Bacteria p__Proteobacteria c__Deltaproteobacteria o__Desulfovibrionales f__Desulfovibrionaceae              | low | 2.451 | 0.010 |
| k__Bacteria p__Proteobacteria c__Alphaproteobacteria o__Azospirillales f__Azospirillaceae                      | low | 2.811 | 0.025 |
| k__Bacteria p__Proteobacteria c__Alphaproteobacteria o__Azospirillales f__Azospirillaceae g__Skermanella       | low | 2.856 | 0.025 |
| k__Bacteria p__Firmicutes c__Clostridia o__Clostridiales f__Peptostreptococcaceae g__Romboutsia                | low | 2.705 | 0.008 |

In this analysis, it was found that a total of 102 bacterial taxa differential abundant between low and high PM<sub>2.5</sub> exposure groups (linear discriminant analysis LDA score >2,  $P < 0.05$ ). There were 82 feature taxa in the low exposure group and 20 feature taxa in the high group, except for 3 unannotated taxa in the low exposure group and 3 in the high group, particularly, a total of 45 bacterial genera were differential abundant between the study groups at the genus level.

**Table S5. Association of KEGG functional pathways with prenatal PM<sub>2.5</sub> exposure was analyzed using MaAsLin2(FDR q-value < 0.25).**

| genus                                                                                                     | Coefficient | P value | q-value |
|-----------------------------------------------------------------------------------------------------------|-------------|---------|---------|
| Environmental.Information.Processing__Signal.transduction__Plant.hormone.signal.transduction.             | -0.253      | 0.000   | 0.003   |
| Metabolism__Amino.acid.metabolism__Alanine..aspartate.and.glutamate.metabolism.                           | -0.021      | 0.000   | 0.003   |
| Not.Included.in.Pathway.or.Brite__Unclassified..signaling.and.cellular.processes__Cell.growth             | -0.069      | 0.000   | 0.003   |
| Metabolism__Biosynthesis.of.other.secondary.metabolites__Neomycin..kanamycin.and.gentamicin.biosynthesis. | -0.254      | 0.000   | 0.008   |
| Metabolism__Metabolism.of.terpenoids.and.polyketides__Nonribosomal.peptide.structures.                    | -0.253      | 0.000   | 0.015   |
| Brite.Hierarchies__Protein.families..signaling.and.cellular.processes__Secretion.system.                  | 0.020       | 0.000   | 0.028   |
| Brite.Hierarchies__Protein.families..metabolism__Polyketide.biosynthesis.proteins.                        | -0.307      | 0.000   | 0.028   |
| Metabolism__Glycan.biosynthesis.and.metabolism__N.Glycan.biosynthesis.                                    | -0.275      | 0.000   | 0.033   |
| Metabolism__Carbohydrate.metabolism__Ascorbate.and.aldarate.metabolism.                                   | 0.052       | 0.000   | 0.044   |
| Human.Diseases__Infectious.disease..parasitic__Amoebiasis.                                                | -0.321      | 0.000   | 0.051   |
| Metabolism__Biosynthesis.of.other.secondary.metabolites__Penicillin.and.cephalosporin.biosynthesis.       | -0.179      | 0.000   | 0.079   |
| Brite.Hierarchies__Protein.families..genetic.information.processing__Transcription.machinery.             | -0.017      | 0.000   | 0.091   |
| Metabolism__Metabolism.of.cofactors.and.vitamins__Nicotinate.and.nicotinamide.metabolism.                 | -0.019      | 0.001   | 0.149   |
| Metabolism__Metabolism.of.cofactors.and.vitamins__Ubiquinone.and.other.terpenoid.quinone.biosynthesis.    | 0.026       | 0.001   | 0.149   |
| Human.Diseases__Neurodegenerative.disease__Parkinson.disease.                                             | -0.106      | 0.001   | 0.162   |
| Metabolism__Energy.metabolism__Carbon.fixation.pathways.in.prokaryotes.                                   | -0.037      | 0.001   | 0.162   |
| Metabolism__Metabolism.of.terpenoids.and.polyketides__Limonene.and.pinene.degradation.                    | -0.257      | 0.001   | 0.191   |

|                                                                                               |        |       |       |
|-----------------------------------------------------------------------------------------------|--------|-------|-------|
| Metabolism__Metabolism.of.terpenoids.and.polyketides__Polyketide.sugar.unit.biosynthesis.     | -0.229 | 0.001 | 0.191 |
| Genetic.Information.Processing__Replication.and.repair__Homologous.recombination.             | -0.018 | 0.001 | 0.206 |
| Metabolism__Lipid.metabolism__Arachidonic.acid.metabolism.                                    | 0.041  | 0.001 | 0.206 |
| Metabolism__Lipid.metabolism__Steroid.biosynthesis.                                           | -0.304 | 0.001 | 0.206 |
| Metabolism__Lipid.metabolism__Steroid.hormone.biosynthesis.                                   | -0.287 | 0.001 | 0.206 |
| Metabolism__Lipid.metabolism__Ether.lipid.metabolism.                                         | -0.317 | 0.002 | 0.247 |
| Organismal.Systems__Immune.system__NOD.like.receptor.signaling.pathway.                       | -0.035 | 0.002 | 0.247 |
| Environmental.Information.Processing__Signal.transduction__Plant.hormone.signal.transduction. | -0.253 | 0.000 | 0.003 |

---

In this analysis, it was found that PM<sub>2.5</sub> exposure groups associated with a total of 24 KEGG functional pathways ( $P < 0.05$  and q-value  $< 0.25$ ).



**Table S6. Spearman's correlation analysis between KEGG functional pathways and prenatal PM<sub>2.5</sub> exposure.**

|                                                      | Ruminococcus<br>gnavus<br>group | Romboutsia | Parabacteroides | Burkholderia<br>Caballeronia<br>Paraburkholderia | Blautia | Bacteroides | Alistipes |
|------------------------------------------------------|---------------------------------|------------|-----------------|--------------------------------------------------|---------|-------------|-----------|
| <b>r</b>                                             |                                 |            |                 |                                                  |         |             |           |
| Plant.hormone.signal.transduction.                   | 0.914                           | 0.442      | 0.307           | 0.237                                            | 0.617   | 0.121       | 0.068     |
| Alanine..aspartate.and.glutamate.metabolism.         | 0.195                           | 0.273      | 0.398           | 0.171                                            | 0.359   | 0.472       | 0.423     |
| Cell.growth                                          | 0.327                           | 0.357      | 0.459           | 0.066                                            | 0.494   | 0.458       | 0.370     |
| Neomycin..kanamycin.and.gentamicin.biosynthesis.     | 0.491                           | 0.378      | 0.239           | 0.311                                            | 0.476   | 0.142       | 0.153     |
| Nonribosomal.peptide.structures.                     | 0.367                           | 0.405      | 0.446           | 0.323                                            | 0.607   | 0.455       | 0.456     |
| Secretion.system.                                    | -0.129                          | -0.154     | -0.367          | -0.064                                           | -0.192  | -0.363      | -0.406    |
| Polyketide.biosynthesis.proteins.                    | 0.226                           | 0.279      | 0.262           | 0.242                                            | 0.319   | 0.249       | 0.267     |
| N.Glycan.biosynthesis.                               | 0.229                           | 0.365      | 0.520           | 0.299                                            | 0.503   | 0.604       | 0.635     |
| Ascorbate.and.aldarate.metabolism.                   | -0.190                          | -0.204     | -0.404          | -0.201                                           | -0.299  | -0.395      | -0.477    |
| Amoebiasis.                                          | 0.361                           | 0.411      | 0.479           | 0.199                                            | 0.541   | 0.471       | 0.399     |
| Penicillin.and.cephalosporin.biosynthesis.           | 0.400                           | 0.317      | 0.382           | 0.396                                            | 0.507   | 0.390       | 0.450     |
| Transcription.machinery.                             | 0.303                           | 0.257      | 0.406           | 0.314                                            | 0.437   | 0.363       | 0.501     |
| Nicotinate.and.nicotinamide.metabolism.              | 0.318                           | 0.253      | 0.306           | 0.314                                            | 0.370   | 0.335       | 0.369     |
| Ubiquinone.and.other.terpenoid.quinone.biosynthesis. | -0.389                          | -0.286     | -0.373          | -0.303                                           | -0.433  | -0.342      | -0.381    |
| Parkinson.disease.                                   | 0.467                           | 0.357      | 0.366           | 0.200                                            | 0.532   | 0.307       | 0.247     |
| Carbon.fixation.pathways.in.prokaryotes.             | 0.360                           | 0.238      | 0.352           | 0.151                                            | 0.379   | 0.301       | 0.300     |

|                                                  |        |        |        |        |        |        |        |
|--------------------------------------------------|--------|--------|--------|--------|--------|--------|--------|
| Limonene.and.pinene.degradation.                 | 0.535  | 0.360  | 0.298  | 0.609  | 0.475  | 0.141  | 0.218  |
| Polyketide.sugar.unit.biosynthesis.              | 0.350  | 0.440  | 0.485  | 0.429  | 0.507  | 0.442  | 0.418  |
| Homologous.recombination.                        | 0.243  | 0.215  | 0.326  | -0.085 | 0.278  | 0.295  | 0.200  |
| Arachidonic.acid.metabolism.                     | -0.118 | -0.312 | -0.344 | -0.052 | -0.284 | -0.387 | -0.272 |
| Steroid.biosynthesis.                            | 0.215  | 0.484  | 0.527  | 0.525  | 0.455  | 0.536  | 0.608  |
| Steroid.hormone.biosynthesis.                    | 0.177  | 0.322  | 0.450  | 0.412  | 0.423  | 0.531  | 0.708  |
| Ether.lipid.metabolism.                          | 0.248  | 0.349  | 0.320  | 0.491  | 0.370  | 0.278  | 0.479  |
| NOD.like.receptor.signaling.pathway.             | 0.349  | 0.290  | 0.423  | 0.221  | 0.428  | 0.395  | 0.395  |
| <i>P value</i>                                   |        |        |        |        |        |        |        |
| Plant.hormone.signal.transduction.               | 0.000  | 0.000  | 0.000  | 0.000  | 0.000  | 0.021  | 0.195  |
| Alanine..aspartate.and.glutamate.metabolism.     | 0.000  | 0.000  | 0.000  | 0.001  | 0.000  | 0.000  | 0.000  |
| Cell.growth                                      | 0.000  | 0.000  | 0.000  | 0.213  | 0.000  | 0.000  | 0.000  |
| Neomycin..kanamycin.and.gentamicin.biosynthesis. | 0.000  | 0.000  | 0.000  | 0.000  | 0.000  | 0.007  | 0.004  |
| Nonribosomal.peptide.structures.                 | 0.000  | 0.000  | 0.000  | 0.000  | 0.000  | 0.000  | 0.000  |
| Secretion.system.                                | 0.014  | 0.003  | 0.000  | 0.228  | 0.000  | 0.000  | 0.000  |
| Polyketide.biosynthesis.proteins.                | 0.000  | 0.000  | 0.000  | 0.000  | 0.000  | 0.000  | 0.000  |
| N.Glycan.biosynthesis.                           | 0.000  | 0.000  | 0.000  | 0.000  | 0.000  | 0.000  | 0.000  |
| Ascorbate.and.aldarate.metabolism.               | 0.000  | 0.000  | 0.000  | 0.000  | 0.000  | 0.000  | 0.000  |
| Amoebiasis.                                      | 0.000  | 0.000  | 0.000  | 0.000  | 0.000  | 0.000  | 0.000  |
| Penicillin.and.cephalosporin.biosynthesis.       | 0.000  | 0.000  | 0.000  | 0.000  | 0.000  | 0.000  | 0.000  |
| Transcription.machinery.                         | 0.000  | 0.000  | 0.000  | 0.000  | 0.000  | 0.000  | 0.000  |

|                                                      |       |       |       |       |       |       |       |
|------------------------------------------------------|-------|-------|-------|-------|-------|-------|-------|
| Nicotinate.and.nicotinamide.metabolism.              | 0.000 | 0.000 | 0.000 | 0.000 | 0.000 | 0.000 | 0.000 |
| Ubiquinone.and.other.terpenoid.quinone.biosynthesis. | 0.000 | 0.000 | 0.000 | 0.000 | 0.000 | 0.000 | 0.000 |
| Parkinson.disease.                                   | 0.000 | 0.000 | 0.000 | 0.000 | 0.000 | 0.000 | 0.000 |
| Carbon.fixation.pathways.in.prokaryotes.             | 0.000 | 0.000 | 0.000 | 0.004 | 0.000 | 0.000 | 0.000 |
| Limonene.and.pinene.degradation.                     | 0.000 | 0.000 | 0.000 | 0.000 | 0.000 | 0.007 | 0.000 |
| Polyketide.sugar.unit.biosynthesis.                  | 0.000 | 0.000 | 0.000 | 0.000 | 0.000 | 0.000 | 0.000 |
| Homologous.recombination.                            | 0.000 | 0.000 | 0.000 | 0.107 | 0.000 | 0.000 | 0.000 |
| Arachidonic.acid.metabolism.                         | 0.025 | 0.000 | 0.000 | 0.320 | 0.000 | 0.000 | 0.000 |
| Steroid.biosynthesis.                                | 0.000 | 0.000 | 0.000 | 0.000 | 0.000 | 0.000 | 0.000 |
| Steroid.hormone.biosynthesis.                        | 0.001 | 0.000 | 0.000 | 0.000 | 0.000 | 0.000 | 0.000 |
| Ether.lipid.metabolism.                              | 0.000 | 0.000 | 0.000 | 0.000 | 0.000 | 0.000 | 0.000 |
| NOD.like.receptor.signaling.pathway.                 | 0.000 | 0.000 | 0.000 | 0.000 | 0.000 | 0.000 | 0.000 |

---

Note: The  $r$  value indicates the Spearman correlation of the pathway with the characteristic bacterial genus, while the  $P$  value manifests the significance of their correlation.

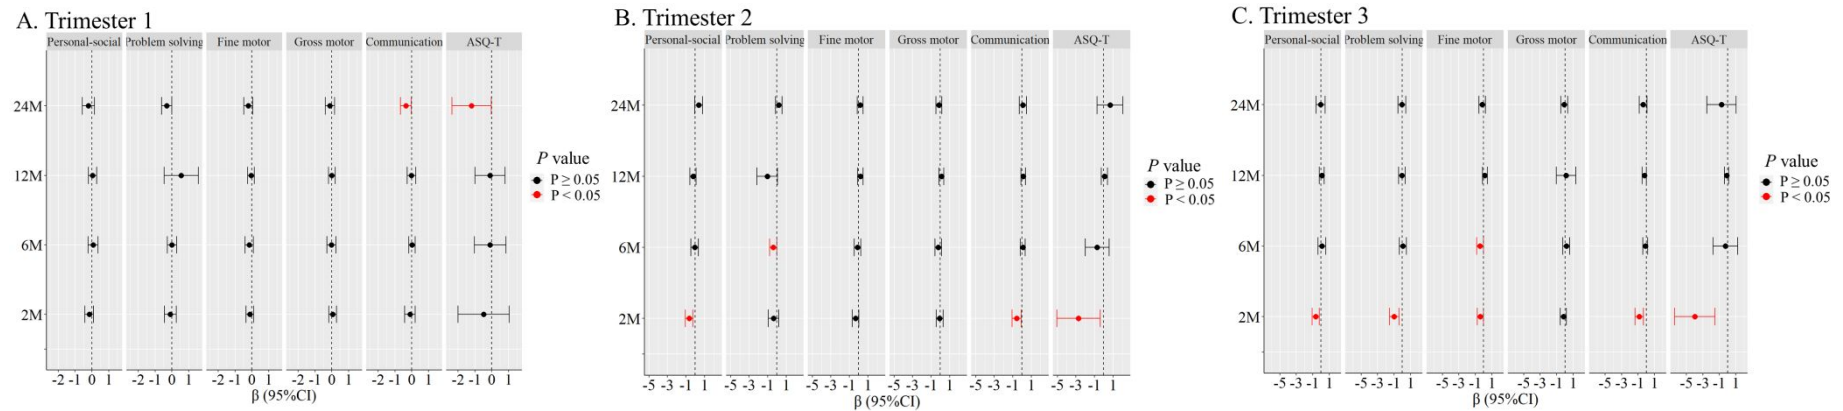

**Figure S1. Prenatal individual PM<sub>2.5</sub> exposure of entire pregnancy and children's ASQ scores**

Note: Results were presented as calculated values and 95% confidence intervals (CI) and the highlighted associations in red are at *P* value 0.05. These models adjusted for confounding factors of parents' characteristic (parity, maternal age, maternal pre-gravid BMI, maternal physical activity, maternal educational level, annual family income, pregnancy syndrome, passive smoking status, season of conception, delivery mode, paternal age) and children (child age at ASQ test, feeding patterns and child sex).

Abbreviations: BMI, body mass index, ASQ, Ages and Stages Questionnaire, SDD, suspected developmental delay at follow up point.

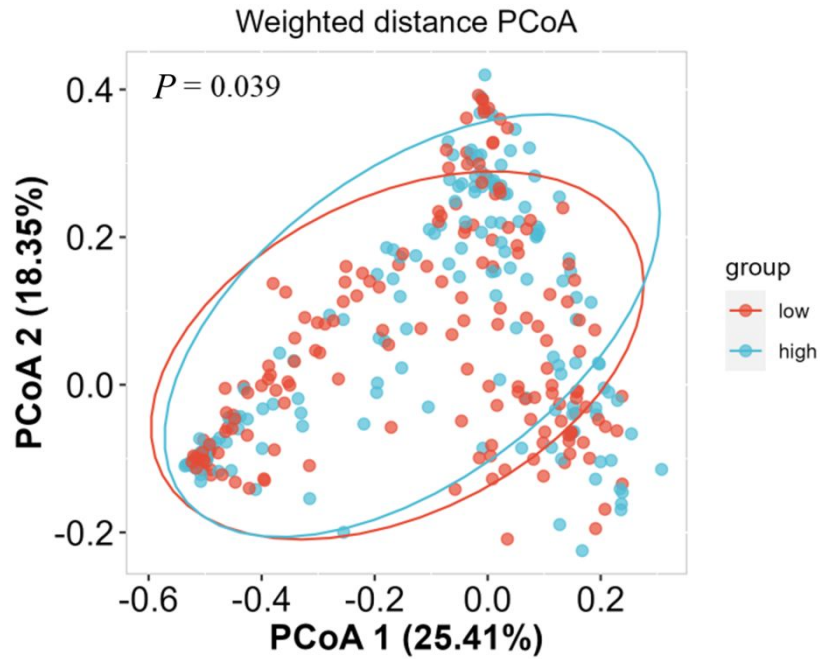

**Figure S2. The microbiota structures of neonatal feces samples from the prenatal  $PM_{2.5}$  high exposure group and low group.**

Note: The PCoA result revealed a significant diverse in gut microbiome structure between the two groups (PERMANOVA,  $P = 0.039$ ). The two principal component scores contribute to 25.41% (PCoA1) and 18.35% (PCoA2) of total variations. Each symbol indicates an individual sample.

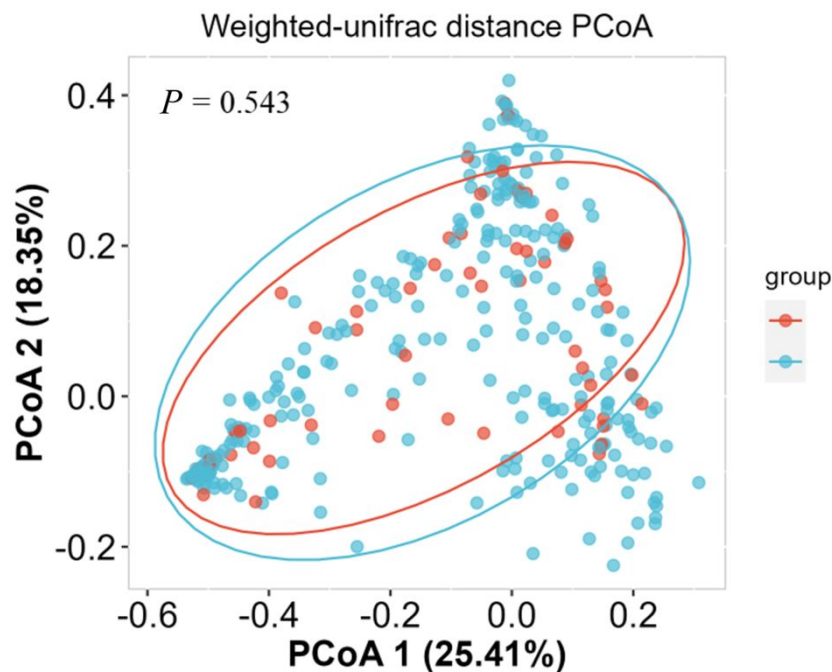

**Figure S3. The microbiota structures of neonatal feces samples from the SDD group and control group.**

Note: The PCoA result found no significant difference in gut microbiome structure between the two groups (PERMANOVA,  $P = 0.543$ ). The two principal component scores contribute to 25.41% (PCoA1) and 18.35% (PCoA2) of total variations. Each symbol indicates an individual sample.
